# Supplementary material for: Patients with Primary Central Nervous System Lymphoma Not Eligible for Clinical Trials: Prognostic Factors, Treatment and Outcome
Source: MDPI journal article supplement (doi:10.3390/cancers13122934), 2021-06-11
Supplement: s1 [file s1]

Supplementary Material

# Patients with Primary Central Nervous System Lymphoma Not Eligible for Clinical Trials: Prognostic Factors, Treatment and Outcome

Sabine Seidel, Michelle Margold, Thomas Kowalski, Alexander Baraniskin, Roland Schroers, Agnieszka Korfel, Eckhard Thiel, Michael Weller, Peter Martus and Uwe Schlegel

**Table S1.** Chemotherapy protocol including rituxumab and temozolomide.

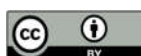

**Copyright:** © 2021 by the authors. Licensee MDPI, Basel, Switzerland. This article is an open access article distributed under the terms and conditions of the Creative Commons Attribution (CC BY) license (<http://creativecommons.org/licenses/by/4.0/>).

|                                                   | Day 1 | Day 2 | Day 3 | Day 4 | Day 5 | Day 6 | Day 14 |
|---------------------------------------------------|-------|-------|-------|-------|-------|-------|--------|
| <i>Cycle 1 (1 cycle = 28 days)</i>                |       |       |       |       |       |       |        |
| Rituximab 375 mg/m <sup>2</sup> IV                | x     |       |       |       |       |       | x      |
| Temozolomide 150 mg/m <sup>2</sup> PO             |       | x     | x     | x     | x     | x     |        |
| <i>Cycles 2–6<sup>a</sup> (1 cycle = 28 days)</i> |       |       |       |       |       |       |        |
| Rituximab 375 mg/m <sup>2</sup> IV                | x     |       |       |       |       |       | x      |
| Temozolomide 200 mg/m <sup>2</sup> PO             |       | x     | x     | x     | x     | x     |        |

<sup>a</sup> Follow-up MRI planned after three cycles. Abbreviations: IV, intravenous; PO, per os.

**Table S2.** Outcome according to subgroup (*n* = 34).

| Reason for Exclusion                                    | No. of Patients | Age Range (y) | Response after Treatment                                                     | OS (months) |
|---------------------------------------------------------|-----------------|---------------|------------------------------------------------------------------------------|-------------|
| KPS < 30 because of PCNSL                               | 6               | 66–81         | CR <i>n</i> = 3<br>PD <i>n</i> = 1<br>Treatment discontinuation <i>n</i> = 2 | 1 (median)  |
| KPS < 50 <sup>b</sup> independent of diagnosis of PCNSL | 1               | 60            | PD                                                                           | 20          |
| Psychiatric comorbidity                                 | 2               | 26/79         | CR <i>n</i> = 2                                                              | 14/2        |
| Immunosuppression                                       | 7               | 52–75         | CR/CRu <i>n</i> = 4<br>PD <i>n</i> = 2<br>TD <i>n</i> = 1                    | 14 (median) |
| Previous malignancy                                     | 3               | 77–83         | CR <i>n</i> = 2<br>PD <i>n</i> = 1                                           | 16 (median) |
| Heart insufficiency                                     | 3               | 66–74         | CR <i>n</i> = 3                                                              | 31          |

|                                                         |   |       |                                                       |               |
|---------------------------------------------------------|---|-------|-------------------------------------------------------|---------------|
|                                                         |   |       |                                                       | (median)      |
| Renal insufficiency                                     | 5 | 75–80 | PR 1<br>PD 2<br>No treatment 2                        | 2<br>(median) |
| KPS < 50 <sup>b</sup> and<br>psychiatric<br>comorbidity | 3 | 69–79 | CR <i>n</i> = 1<br>PD <i>n</i> = 1<br>TD <i>n</i> = 1 | 2<br>(median) |
| KPS < 30 and<br>heart insufficiency                     | 1 | 74    | CR                                                    | 68            |
| KPS < 30 and<br>psychiatric comorbidity                 | 1 | 62    | CR                                                    | 14            |
| Heart and renal insufficiency                           | 1 | 75    | PD                                                    | 14            |
| Immunosuppression and<br>renal insufficiency            | 1 | 80    | No treatment                                          | 2             |

Abbreviations: CR, complete remission; CRu, complete remission unconfirmed; KPS, Karnofsky performance score; OS, overall survival; PD, progressive disease, PR, partial remission; TD, toxic death.

**Table S3.** Treatment characteristics (*n* = 34).

|                                                            | No. of Patients |
|------------------------------------------------------------|-----------------|
| <i>HDMTX application</i>                                   |                 |
| Yes                                                        | 27 (79.4%)      |
| No                                                         | 7 (20.6%)       |
| <i>Rituximab application</i>                               |                 |
| Yes                                                        | 23 (67.6%)      |
| No                                                         | 11 (32.4%)      |
| <i>First-line treatment</i>                                |                 |
| HDMTX and AraC-based polychemotherapy                      | 10 (29.4%)      |
| HDMTX and AraC-based polychemotherapy + ICV                | 13 (38.2%)      |
| HDMTX and AraC-based polychemotherapy + ITH liposomal AraC | 3 (8.8%)        |
| Rituximab + temozolomide                                   | 3 (8.8%)        |
| WBRT                                                       | 1 (2.9%)        |
| HD-ASCT                                                    | 1 (2.9%)        |
| Palliative treatment                                       | 3 (8.8%)        |
| <i>Second-line treatment (n = 12)</i>                      |                 |
| Temozolomide                                               | 4               |
| Rituximab + temozolomide                                   | 2               |
| MTX + rituximab + temozolomide                             | 1               |
| WBRT                                                       | 2               |
| HD-ASCT                                                    | 2               |
| R-CHOP (systemic relapse)                                  | 1               |
| <i>Third-line treatment (n = 3)</i>                        |                 |
| HD-ASCT                                                    | 1               |
| R-CHOP (systemic relapse)                                  | 1               |
| Temsirolimus                                               | 1               |

Abbreviations: AraC, cytarabine; HDMTX, high-dose methotrexate; ICV, intracerebroventricular; ITH, intrathecal; WBRT, whole-brain radiation therapy; HD ASCT, high-dose chemotherapy with autologous stem-cell transplantation.
